# Supplementary material
Source: ML conference proceedings conference paper supplement (https://openreview.net/forum?id=eJ0dzPJq1F)

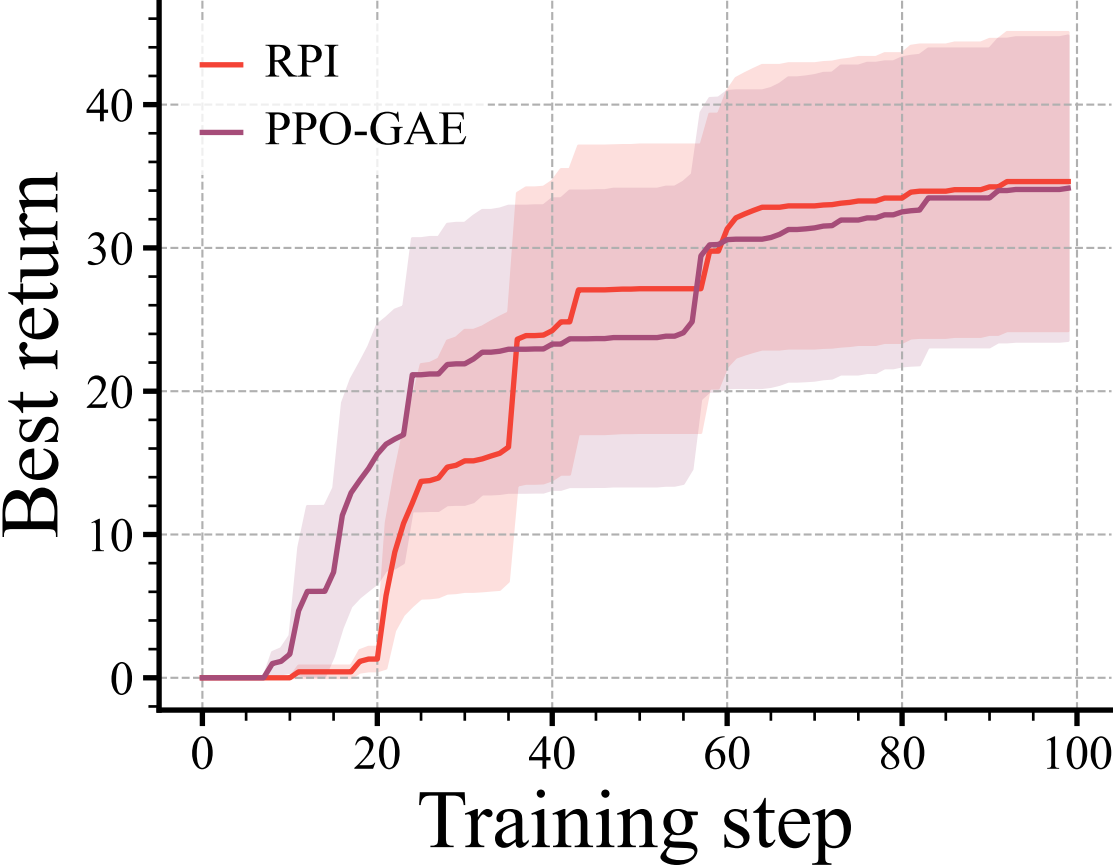

Supplement: supplementary_material [file attachment]

Best return

- RPI-initial stage oracle
- PPI-near optimal oracle

0

100

200

300

0

20

40

60

80

100

Training step

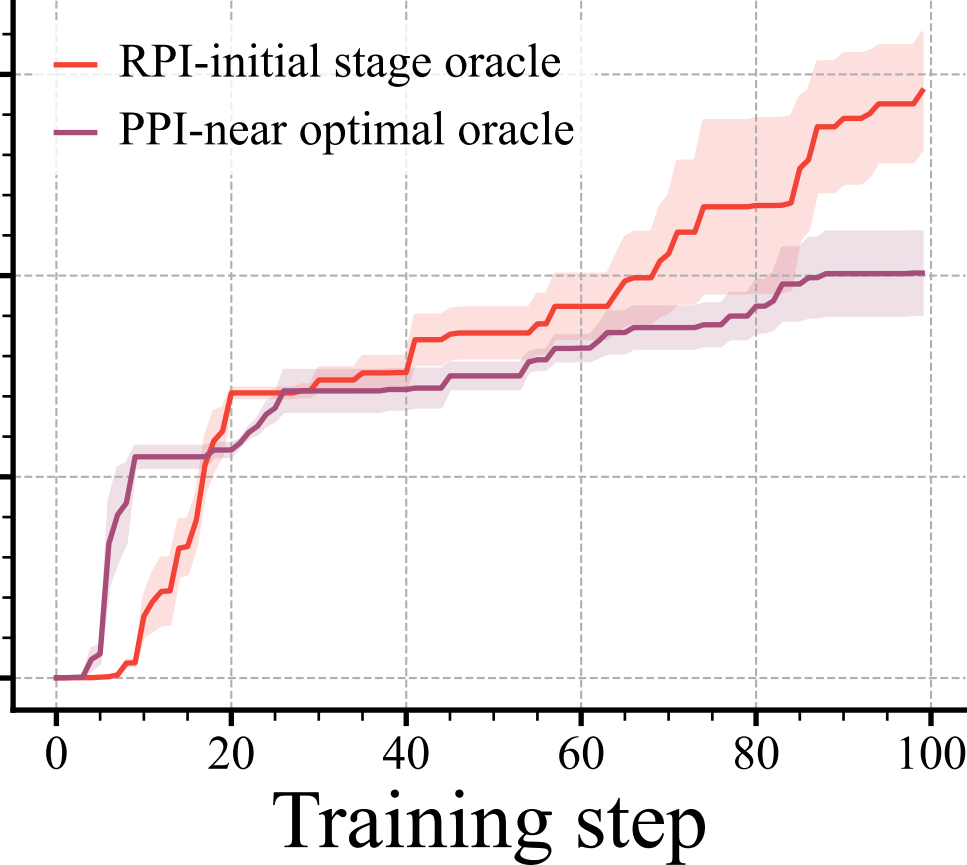

Supplement: supplementary_material [file attachment]

Best return

RPI  
PPO-GAE

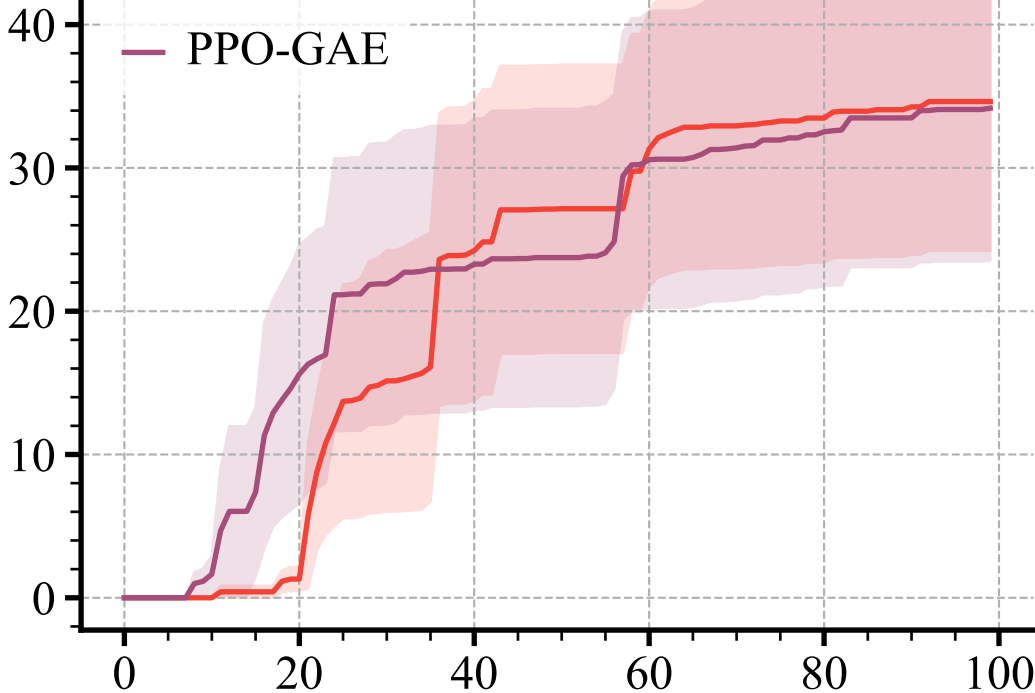

Training step

Supplement: supplementary_material [file attachment]

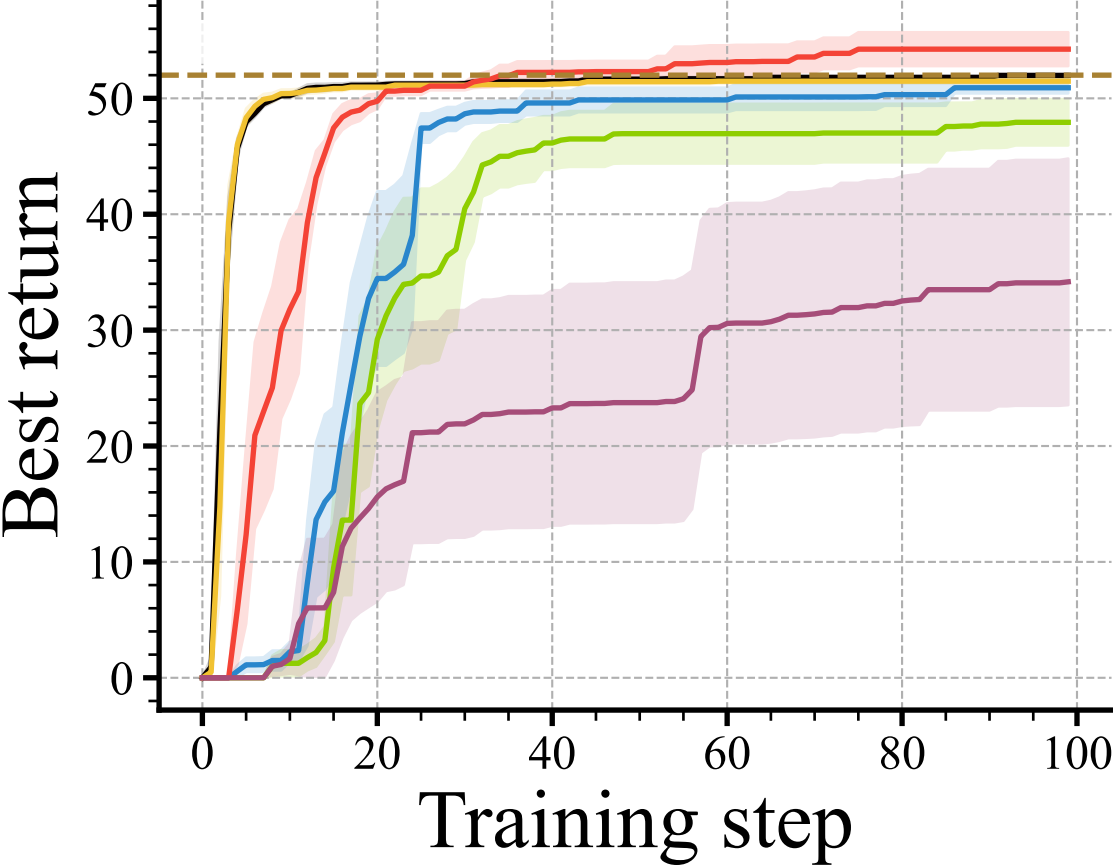

Supplement: supplementary_material [file attachment]

Best return

- RPI-initial stage oracle
- PPI-near optimal oracle

0

100

200

300

0

20

40

60

80

100

Training step



Supplement: supplementary_material [file attachment]

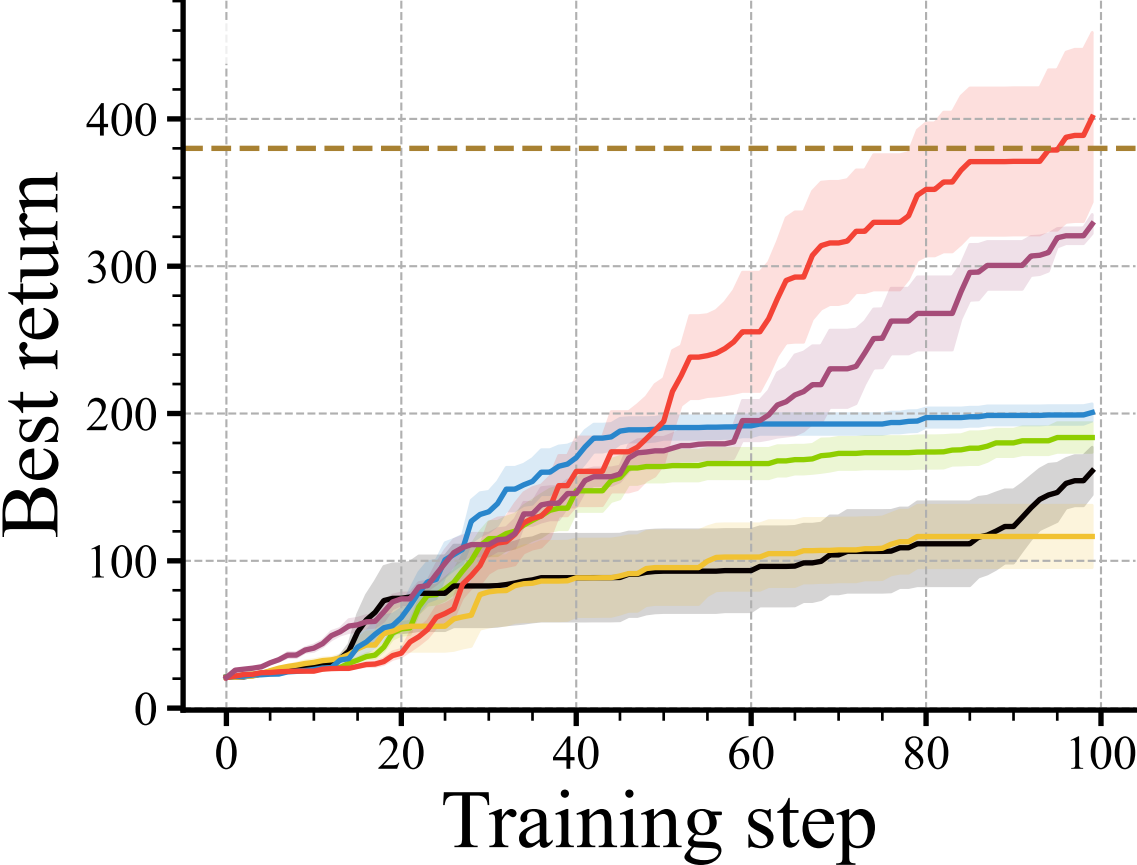

Supplement: supplementary_material [file attachment]

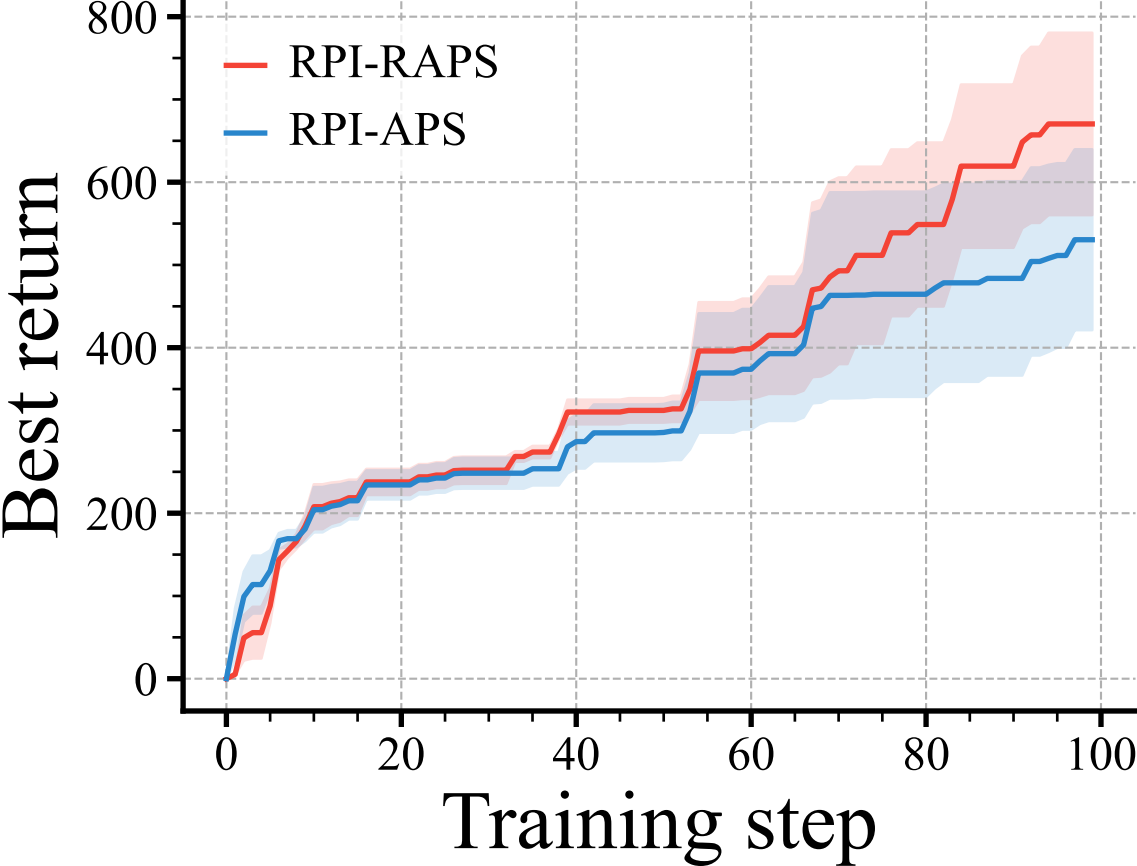

Supplement: supplementary_material [file attachment]



Supplement: supplementary_material [file attachment]

Best return

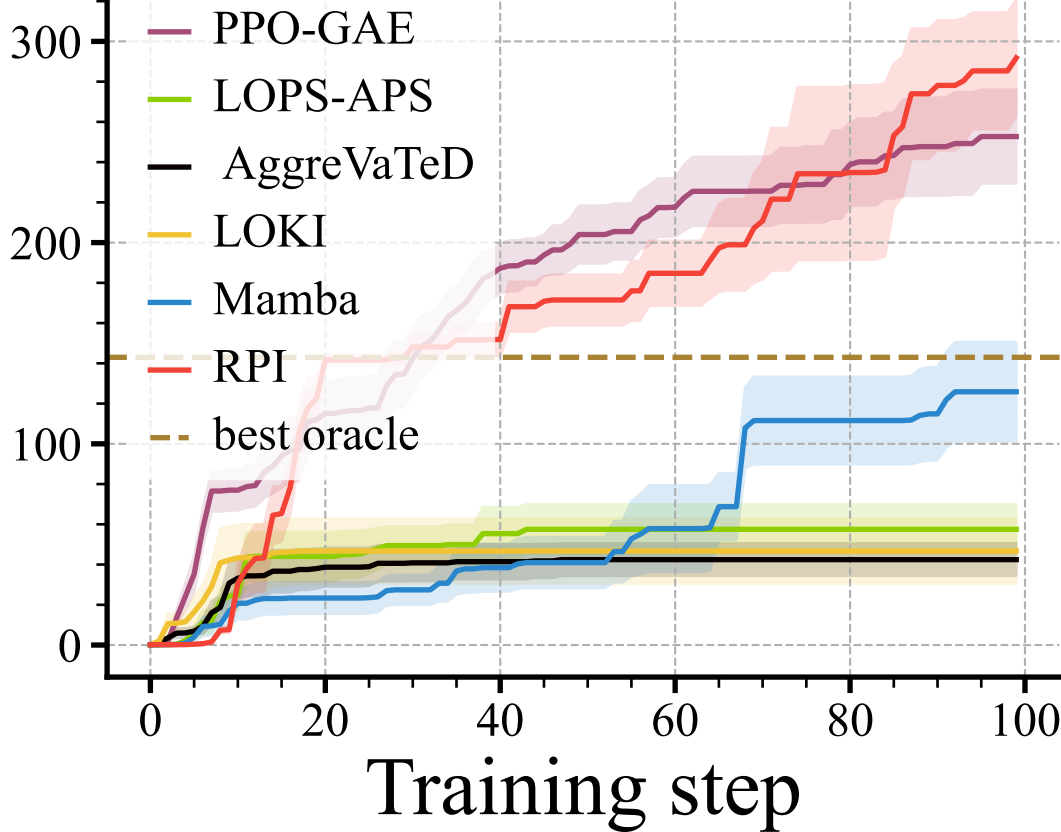

Supplement: supplementary_material [file attachment]

Best return



Supplement: supplementary_material [file attachment]

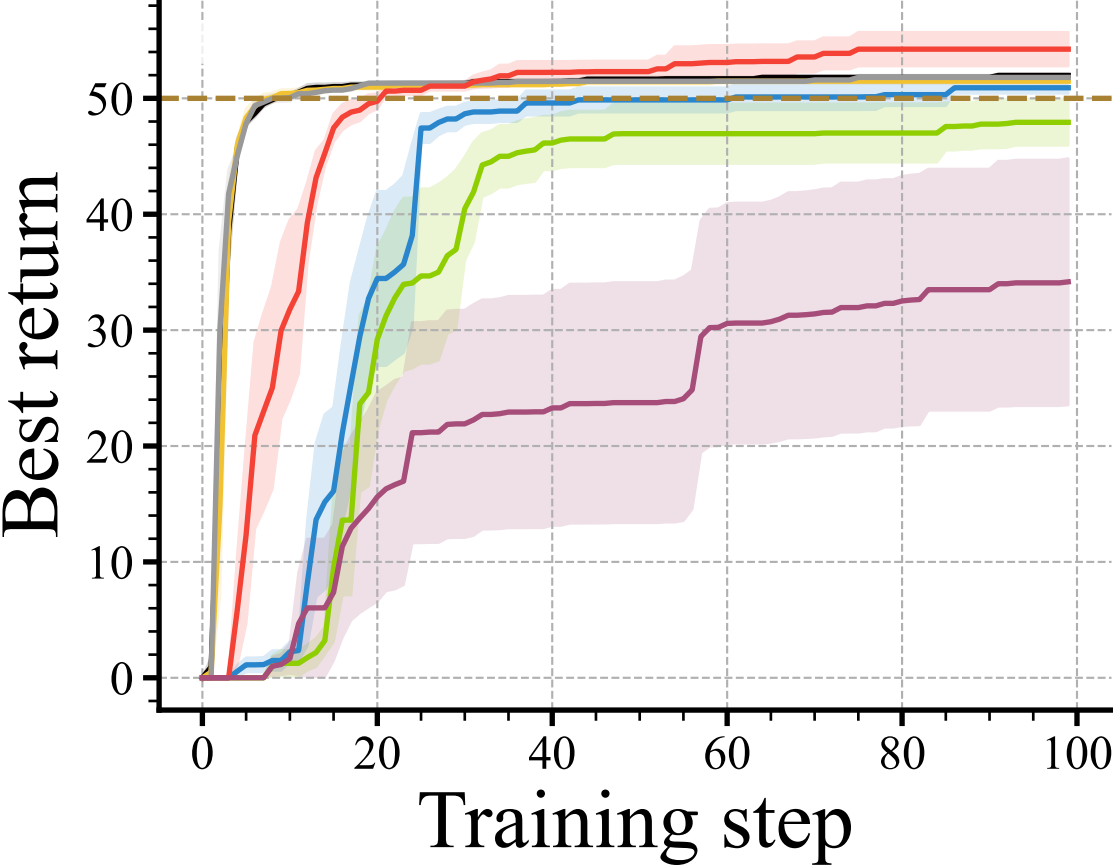

Supplement: supplementary_material [file attachment]

Best return



Supplement: supplementary_material [file attachment]

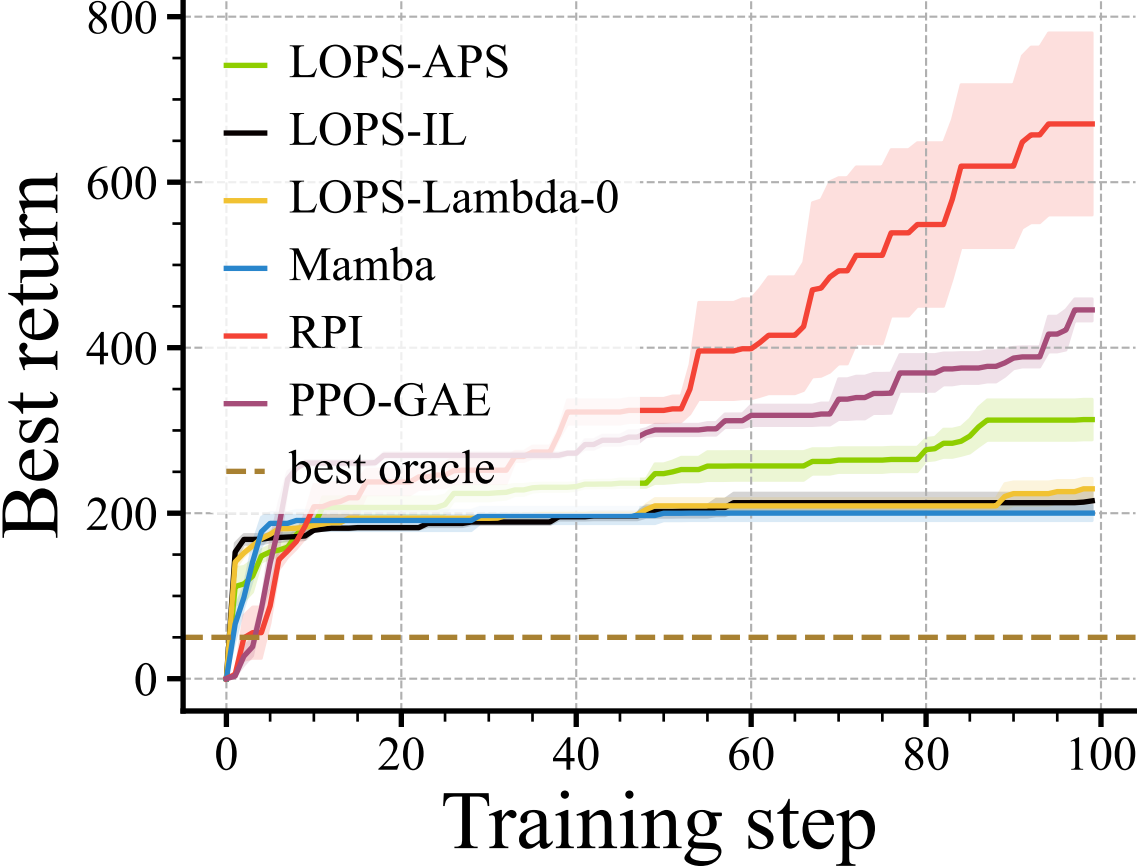

Supplement: supplementary_material [file attachment]



Supplement: supplementary_material [file attachment]

Best return



Supplement: supplementary_material [file attachment]

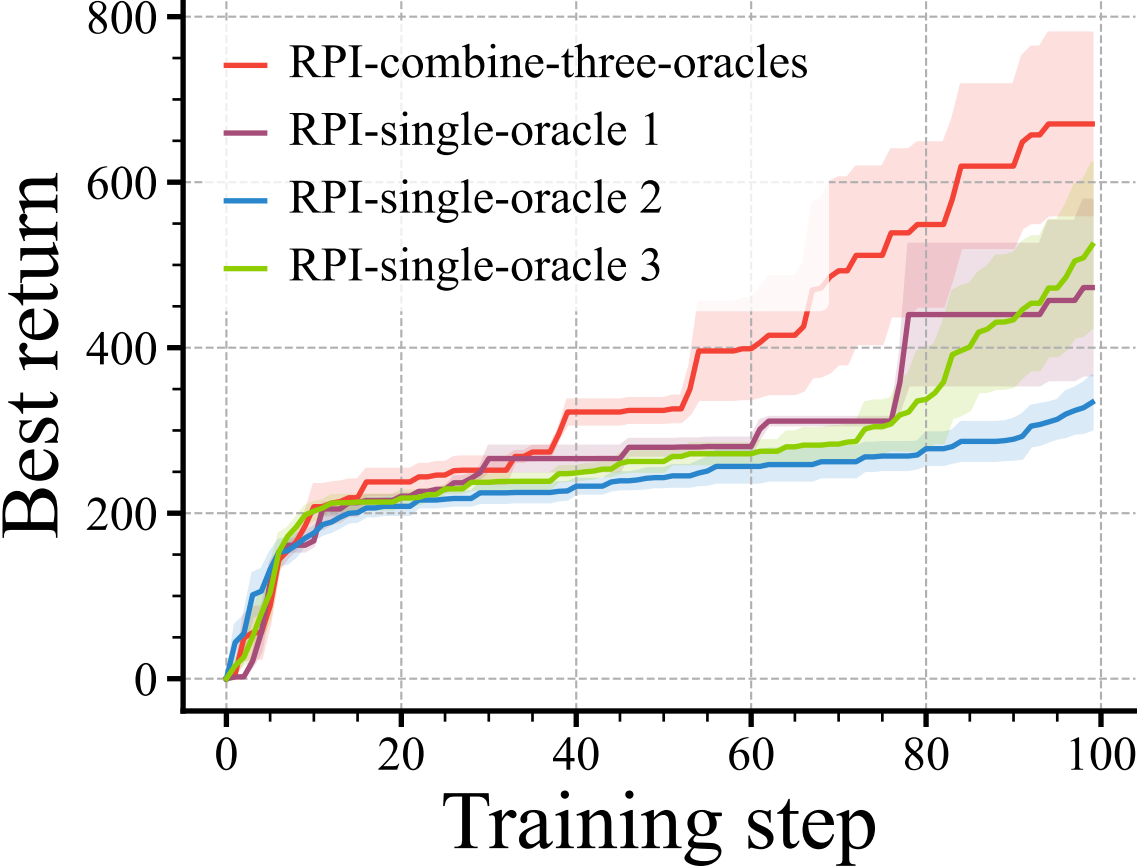

Supplement: supplementary_material [file attachment]

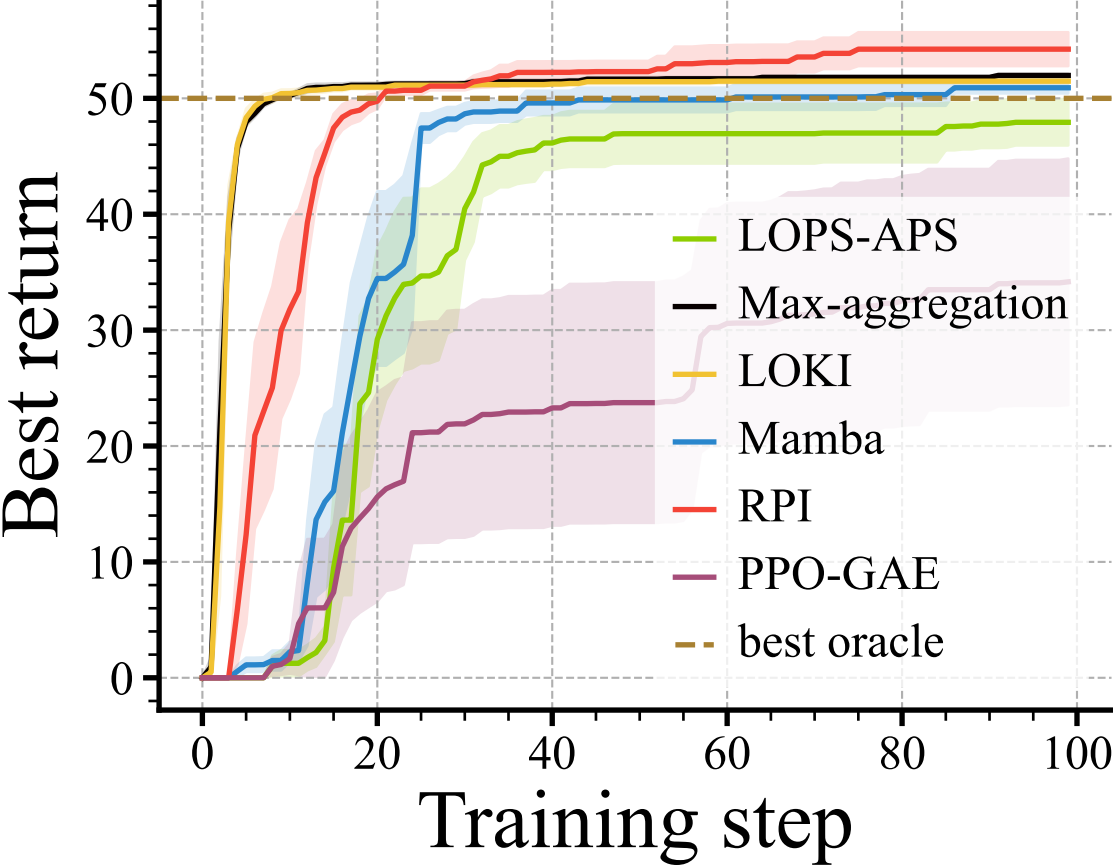

Supplement: supplementary_material [file attachment]



Supplement: supplementary_material [file attachment]

# main-plot-pendulum-swingup-0

exp-ppo-100k, ppo-300k, sac-100k

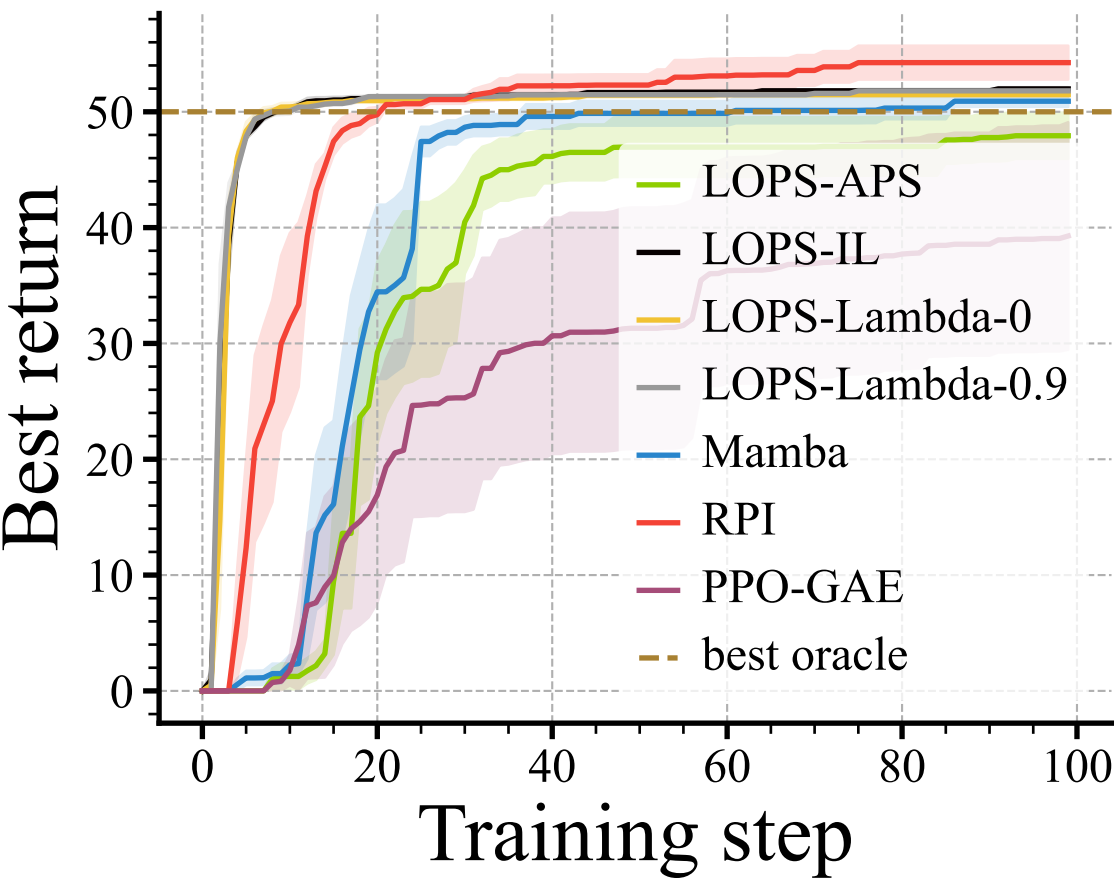

Supplement: supplementary_material [file attachment]



Supplement: supplementary_material [file attachment]

Best return

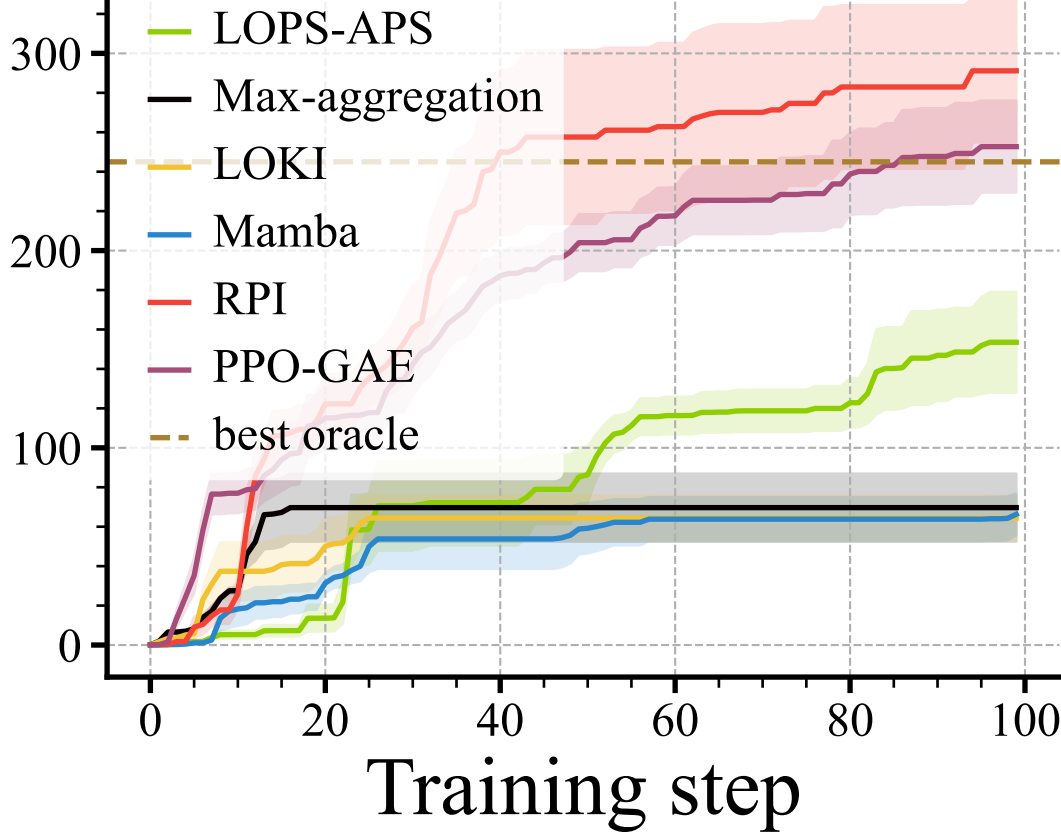

Supplement: supplementary_material [file attachment]



Supplement: supplementary_material [file attachment]

Best return



Supplement: supplementary_material [file attachment]

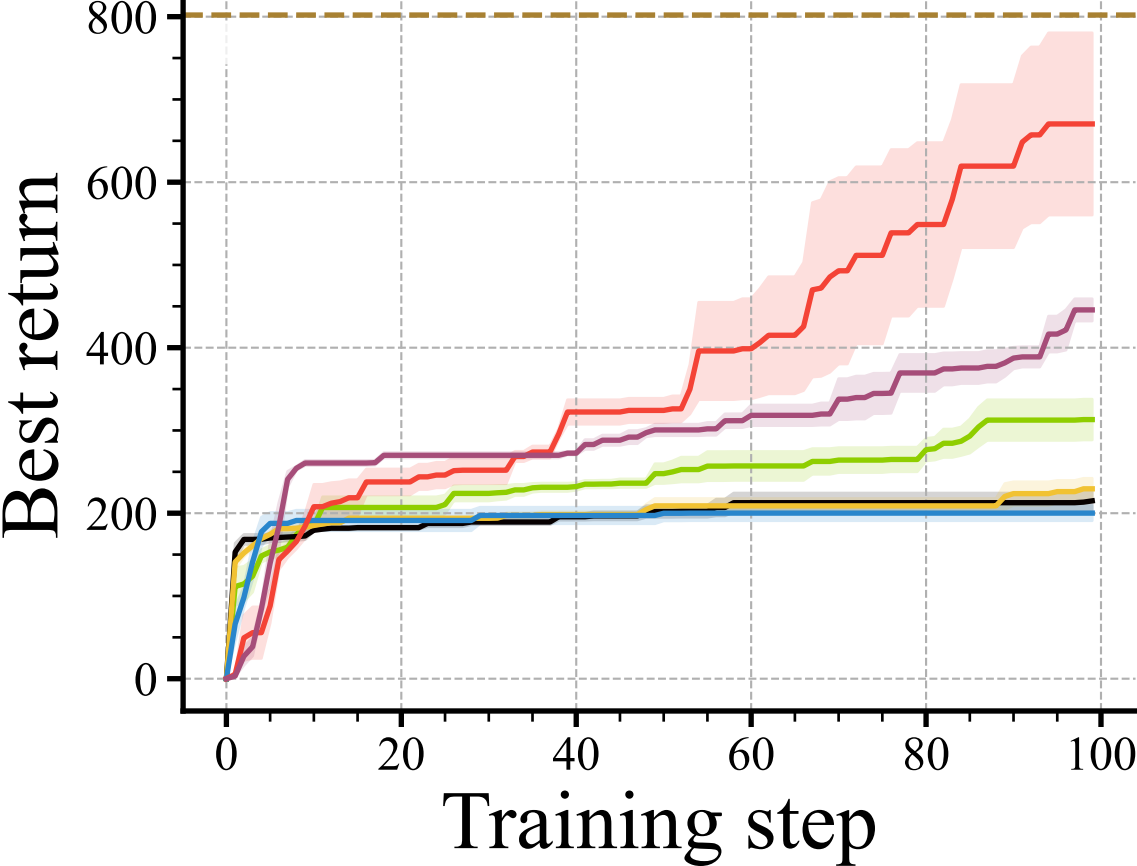

Supplement: supplementary_material [file attachment]

Best return

- RPI-initial stage oracle
- PPI-near optimal oracle

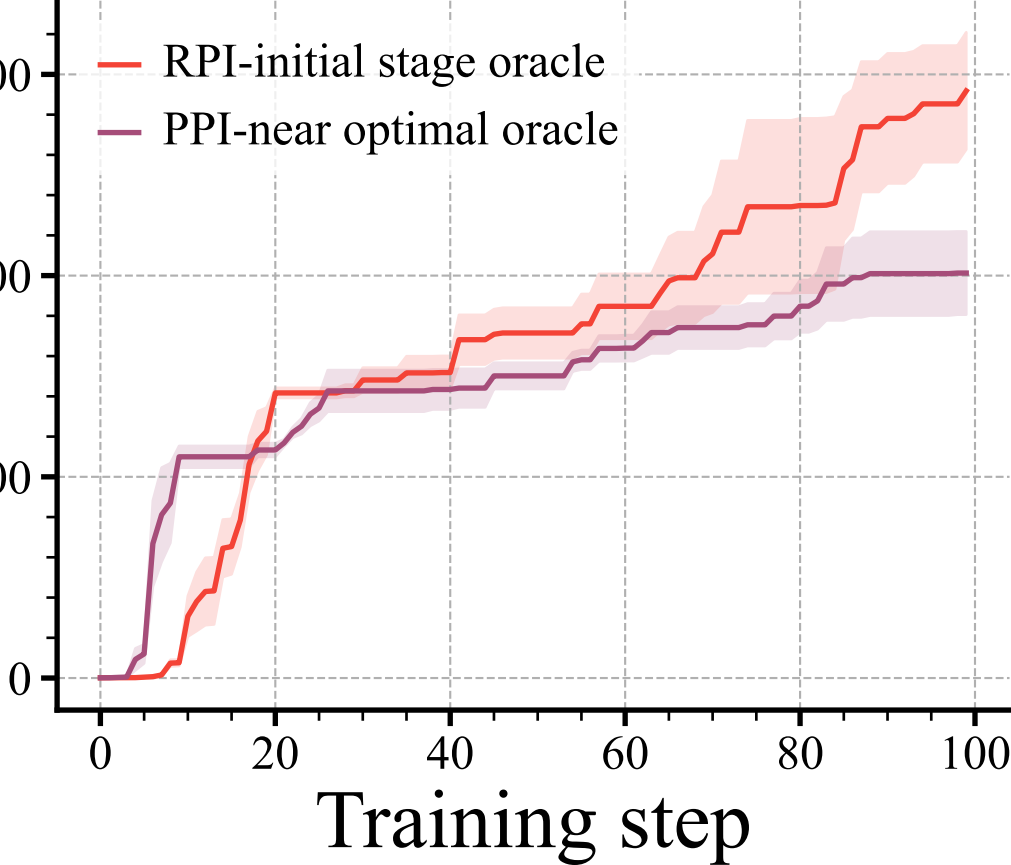

Supplement: supplementary_material [file attachment]

# main-plot-pendulum-swingup-3

exp-ppo-100k, ppo-300k, sac-100k



Supplement: supplementary_material [file attachment]



Supplement: supplementary_material [file attachment]



Supplement: supplementary_material [file attachment]

Best return

- RPI-initial stage oracle
- PPI-near optimal oracle

0

100

200

300

0

20

40

60

80

100

Training step

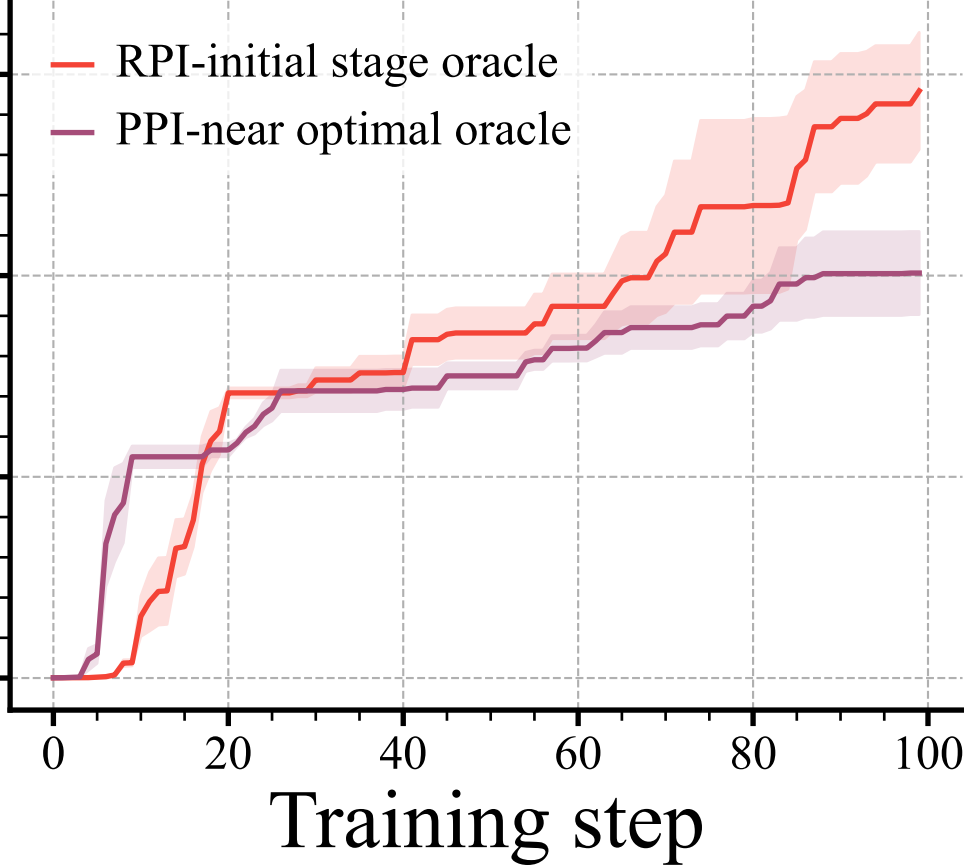

Supplement: supplementary_material [file attachment]



Supplement: supplementary_material [file attachment]



Supplement: supplementary_material [file attachment]

Best return



Supplement: supplementary_material [file attachment]

Best return



Supplement: supplementary_material [file attachment]



Supplement: supplementary_material [file attachment]



Supplement: supplementary_material [file attachment]



Supplement: supplementary_material [file attachment]



Supplement: supplementary_material [file attachment]



Supplement: supplementary_material [file attachment]



Supplement: supplementary_material [file attachment]



Supplement: supplementary_material [file attachment]



Supplement: supplementary_material [file attachment]

Best return

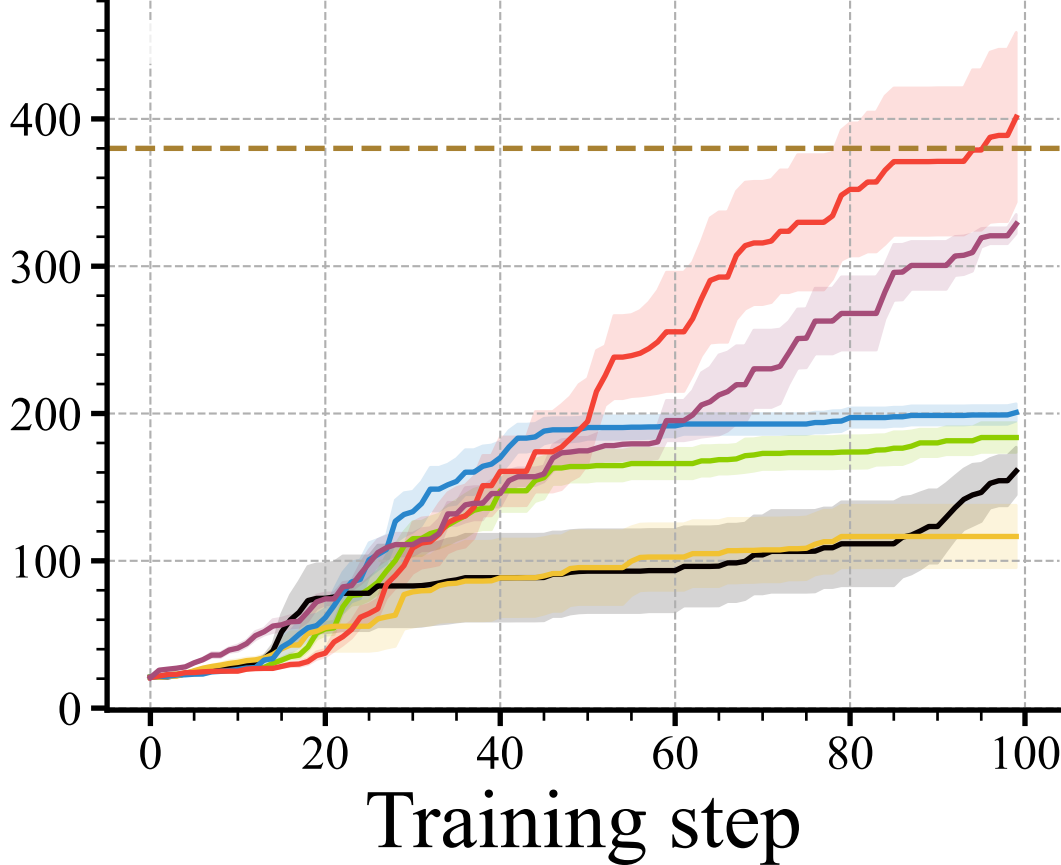

Training step

Supplement: supplementary_material [file attachment]



Supplement: supplementary_material [file attachment]



Supplement: supplementary_material [file attachment]



Supplement: supplementary_material [file attachment]



Supplement: supplementary_material [file attachment]



Supplement: supplementary_material [file attachment]



Supplement: supplementary_material [file attachment]



Supplement: supplementary_material [file attachment]



Supplement: supplementary_material [file attachment]

Best return



Supplement: supplementary_material [file attachment]

Best return



Supplement: supplementary_material [file attachment]

Best return

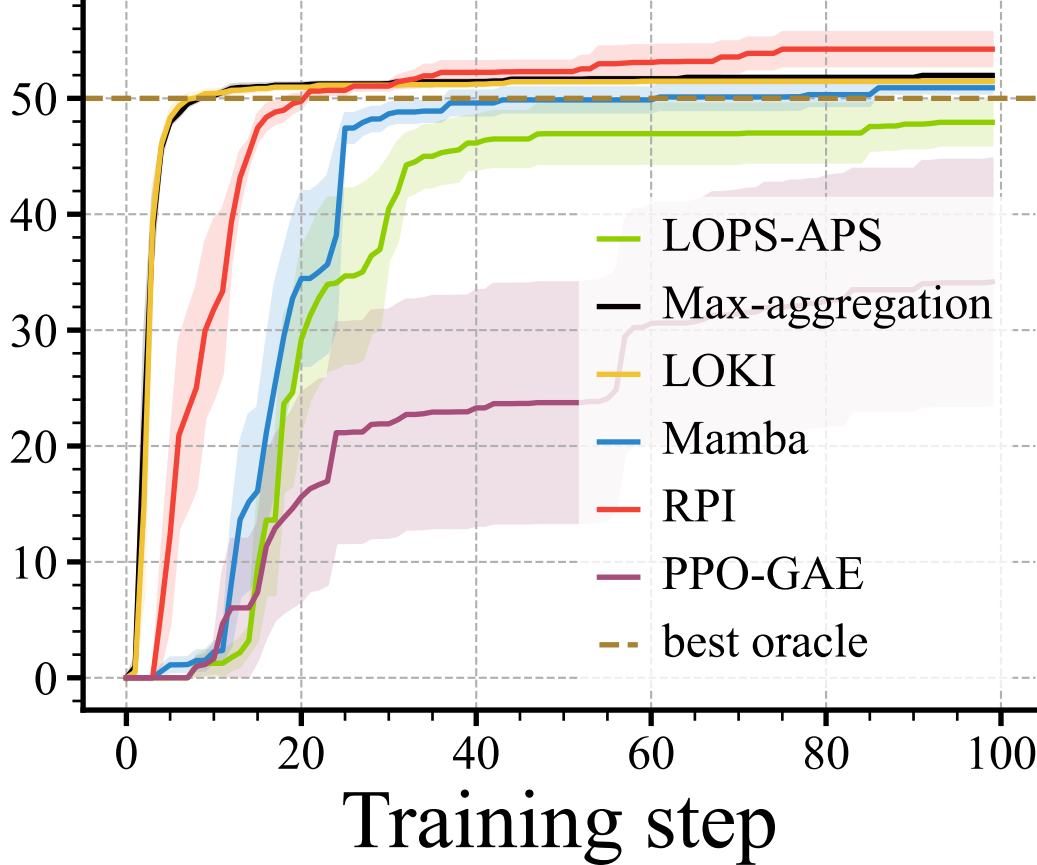

Training step

Supplement: supplementary_material [file attachment]



Supplement: supplementary_material [file attachment]



Supplement: supplementary_material [file attachment]

# main-plot-pendulum-swingup-1

exp-ppo-100k, ppo-300k, sac-100k

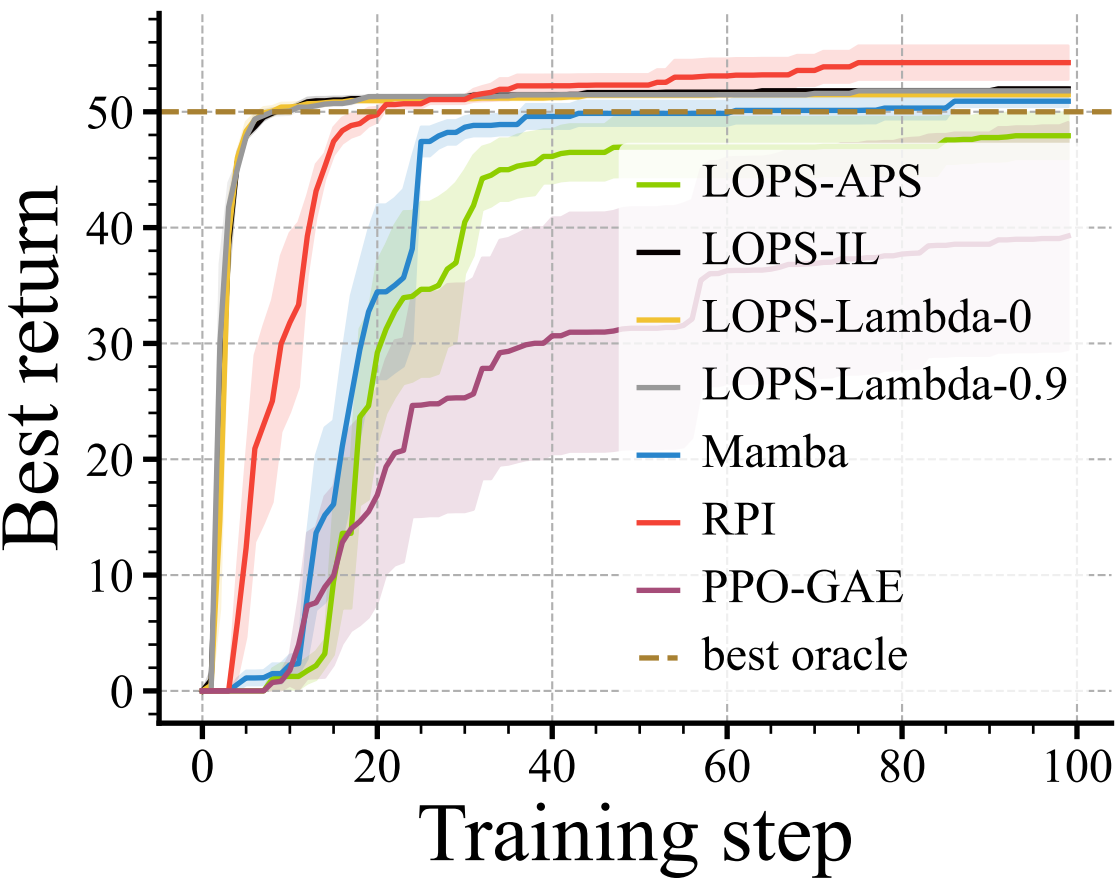

Supplement: supplementary_material [file attachment]

# main-plot-pendulum-swingup-2

exp-ppo-100k, ppo-300k, sac-100k



Supplement: supplementary_material [file attachment]
